# Supplementary material for: Changes in Life Expectancy of Respiratory Diseases from Attaining Daily PM2.5 Standard in China: A Nationwide Observational Study
Source: PubMed Central journal article supplement — Innovation (Camb). 2020 Nov 4;1(3):100064. doi: 10.1016/j.xinn.2020.100064 (PMC8454686; doi:10.1016/j.xinn.2020.100064), 2020-11-04
Supplement: mmc1.pdf [file mmc1.pdf]

XINN, Volume 1

## **Supplemental Information**

### **Changes in Life Expectancy of Respiratory Diseases from Attaining Daily PM<sub>2.5</sub> Standard in China: A Nationwide Observational Study**

**Yin Yang, Jinlei Qi, Zengliang Ruan, Peng Yin, Shiyu Zhang, Jiangmei Liu, Yunning  
Liu, Rui Li, Lijun Wang, and Hualiang Lin**

## Supplemental Information

### Table of Contents

**Table S1.** Life expectancy for Chinese population from 2013 to 2016.

**Table S2.** Spearman correlation coefficients of air pollutant, temperature, and relative humidity.

**Table S3.** The region-specific estimates of changes in years of life lost and excess risk of mortality caused by total respiratory diseases and COPD per 10  $\mu\text{g}/\text{m}^3$  increment of  $\text{PM}_{2.5}$  at lag02.

**Table S4.** The region-specific estimates of changes in years of life lost and excess risk of mortality caused by total respiratory diseases per 10  $\mu\text{g}/\text{m}^3$  increment of  $\text{PM}_{2.5}$  at lag02 (stratified by gender).

**Table S5.** The region-specific estimates of changes in years of life lost and excess risk of mortality caused by COPD per 10  $\mu\text{g}/\text{m}^3$  increment of  $\text{PM}_{2.5}$  at lag02 (stratified by gender).

**Table S6.** The region-specific estimates of changes in years of life lost associated with each 10  $\mu\text{g}/\text{m}^3$  increment in  $\text{PM}_{2.5}$  at lag02 in two-pollutant models.

**Table S7.** Sensitivity analyses for the changes in years of life lost associated with each 10  $\mu\text{g}/\text{m}^3$  increment in  $\text{PM}_{2.5}$  at lag02 in different models, with changing degrees of freedom.

**Table S8.** Sensitivity analyses for the changes in years of life lost associated with each 10  $\mu\text{g}/\text{m}^3$  increment in  $\text{PM}_{2.5}$  at lag02, with adding calendar year in the models.

**Figure S1.** The flow chart of the analytical process.

**Figure S2.** Histogram of daily years of life lost in several Chinese cities during 2013 to 2016.

**Table S1.** Life expectancy for Chinese population from 2013 to 2016.

| <b>Age</b>    | <b>Life expectancy for Male, years</b> |      |      |      | <b>Life expectancy for Female, years</b> |      |      |      |
|---------------|----------------------------------------|------|------|------|------------------------------------------|------|------|------|
|               | 2013                                   | 2014 | 2015 | 2016 | 2013                                     | 2014 | 2015 | 2016 |
| <b>&lt;1</b>  | 74.4                                   | 74.6 | 74.8 | 75.0 | 77.3                                     | 77.5 | 77.7 | 77.9 |
| <b>&lt;4</b>  | 74.2                                   | 74.3 | 74.5 | 74.6 | 77.1                                     | 77.2 | 77.4 | 77.5 |
| <b>&lt;9</b>  | 70.3                                   | 70.5 | 70.6 | 70.7 | 73.2                                     | 73.4 | 73.5 | 73.6 |
| <b>&lt;14</b> | 65.5                                   | 65.6 | 65.7 | 65.8 | 68.4                                     | 68.5 | 68.6 | 68.8 |
| <b>15-19</b>  | 60.6                                   | 60.7 | 60.8 | 60.9 | 63.4                                     | 63.5 | 63.7 | 63.8 |
| <b>20-24</b>  | 55.7                                   | 55.8 | 55.9 | 56.0 | 58.5                                     | 58.6 | 58.8 | 58.9 |
| <b>25-29</b>  | 50.8                                   | 50.9 | 51.1 | 51.2 | 53.6                                     | 53.8 | 53.9 | 54.0 |
| <b>30-34</b>  | 46.0                                   | 46.1 | 46.2 | 46.4 | 48.8                                     | 48.9 | 49.0 | 49.2 |
| <b>35-39</b>  | 41.2                                   | 41.3 | 41.5 | 41.6 | 43.9                                     | 44.1 | 44.2 | 44.3 |
| <b>40-44</b>  | 36.5                                   | 36.6 | 36.7 | 36.8 | 39.1                                     | 39.2 | 39.4 | 39.5 |
| <b>45-49</b>  | 31.8                                   | 31.9 | 32.0 | 32.1 | 34.4                                     | 34.5 | 34.6 | 34.7 |
| <b>50-54</b>  | 27.2                                   | 27.2 | 27.3 | 27.5 | 29.7                                     | 29.8 | 29.9 | 30.0 |
| <b>55-59</b>  | 22.7                                   | 22.8 | 22.9 | 23.0 | 25.1                                     | 25.2 | 25.3 | 25.4 |
| <b>60-64</b>  | 18.5                                   | 18.5 | 18.6 | 18.7 | 20.7                                     | 20.8 | 20.9 | 21.0 |
| <b>65-69</b>  | 14.6                                   | 14.7 | 14.8 | 14.9 | 16.6                                     | 16.7 | 16.8 | 16.9 |
| <b>70-74</b>  | 11.3                                   | 11.4 | 11.4 | 11.5 | 13.0                                     | 13.1 | 13.2 | 13.3 |
| <b>75-79</b>  | 8.6                                    | 8.7  | 8.7  | 8.8  | 9.9                                      | 10.0 | 10.0 | 10.1 |
| <b>80-84</b>  | 6.6                                    | 6.6  | 6.7  | 6.7  | 7.4                                      | 7.4  | 7.5  | 7.5  |
| <b>85+</b>    | 4.9                                    | 4.9  | 5.0  | 5.0  | 5.4                                      | 5.5  | 5.5  | 5.6  |

**Table S2.** Spearman correlation coefficients of air pollutant, temperature, and relative humidity.

|                   | PM <sub>2.5</sub> | O <sub>3</sub> | NO <sub>2</sub> | SO <sub>2</sub> | Temperature | Relative humidity |
|-------------------|-------------------|----------------|-----------------|-----------------|-------------|-------------------|
| PM <sub>2.5</sub> | 1.00              |                |                 |                 |             |                   |
| O <sub>3</sub>    | 0.42              | 1.00           |                 |                 |             |                   |
| NO <sub>2</sub>   | 0.47              | -0.01          | 1.00            |                 |             |                   |
| SO <sub>2</sub>   | 0.28              | 0.47           | 0.36            | 1.00            |             |                   |
| Temperature       | -0.14             | 0.17           | -0.30           | -0.24           | 1.00        |                   |
| Relative humidity | -0.04             | -0.13          | -0.12           | -0.14           | 0.22        | 1.00              |

**Table S3.** The region-specific estimates of changes in years of life lost and excess risk of mortality caused by total respiratory diseases and COPD per 10  $\mu\text{g}/\text{m}^3$  increment of  $\text{PM}_{2.5}$  at lag02.

| Region                 | Changes in years of life lost (95% CI) |                          | Excess risk of mortality, % (95% CI) |                          |
|------------------------|----------------------------------------|--------------------------|--------------------------------------|--------------------------|
|                        | Respiratory diseases                   | COPD                     | Respiratory diseases                 | COPD                     |
| East (n=31)            | <b>0.23 (0.11, 0.36)</b>               | <b>0.18 (0.09, 0.27)</b> | <b>0.30 (0.14, 0.46)</b>             | <b>0.28 (0.17, 0.39)</b> |
| South (n=8)            | 0.04 (-0.14, 0.22)                     | 0.05 (-0.05, 0.16)       | 0.08 (-0.17, 0.33)                   | 0.18 (-0.17, 0.53)       |
| Southwest (n=8)        | <b>0.42 (0.22, 0.62)</b>               | 1.07 (-1.14, 3.27)       | <b>0.52 (0.33, 0.70)</b>             | 1.04 (-0.13, 2.23)       |
| North (n=8)            | -0.02 (-0.09, 0.05)                    | 0.02 (-0.02, 0.05)       | 0.06 (-0.07, 0.18)                   | 0.12 (-0.06, 0.30)       |
| Northeast (n=14)       | 0.07 (-0.08, 0.23)                     | 0.03 (-0.07, 0.12)       | 0.04 (-0.18, 0.26)                   | 0.003 (-0.28, 0.28)      |
| Northwest (n=12)       | 0.19 (-0.15, 0.53)                     | 0.11 (-0.01, 0.22)       | <b>0.71 (0.22, 1.21)</b>             | <b>0.64 (0.25, 1.04)</b> |
| Central (n=15)         | 0.21 (-0.27, 0.70)                     | 0.04 (-0.38, 0.47)       | 0.19 (-0.18, 0.56)                   | 0.16 (-0.24, 0.57)       |
| <b>National (n=96)</b> | <b>0.16 (0.08, 0.24)</b>               | <b>0.10 (0.05, 0.15)</b> | <b>0.26 (0.15, 0.37)</b>             | <b>0.28 (0.15, 0.41)</b> |

**Note:** lag02, moving averaged concentration of lag 0 to lag 2 of daily  $\text{PM}_{2.5}$ ; bold typeface indicates statistically significant ( $P < 0.05$ ).

**Table S4.** The region-specific estimates of changes in years of life lost and excess risk of mortality caused by total respiratory diseases per 10  $\mu\text{g}/\text{m}^3$  increment of  $\text{PM}_{2.5}$  at lag02 (stratified by gender).

| Region                 | Changes in years of life lost (95% CI) |                          | Excess risk of mortality, % (95% CI) |                          |
|------------------------|----------------------------------------|--------------------------|--------------------------------------|--------------------------|
|                        | Male                                   | Female                   | Male                                 | Female                   |
| East (n=31)            | <b>0.08 (0.003, 0.15)</b>              | <b>0.13 (0.07, 0.20)</b> | 0.10 (-0.03, 0.24)                   | <b>0.47 (0.29, 0.65)</b> |
| South (n=8)            | 0.02 (-0.11, 0.16)                     | 0.01 (-0.09, 0.11)       | 0.10 (-0.16, 0.37)                   | 0.04 (-0.33, 0.41)       |
| Southwest (n=8)        | <b>0.28 (0.14, 0.42)</b>               | <b>0.14 (0.04, 0.23)</b> | <b>0.50 (0.30, 0.71)</b>             | 0.77 (-0.09, 1.63)       |
| North (n=8)            | -0.03 (-0.08, 0.03)                    | 0.002 (-0.04, 0.04)      | -0.04 (-0.20, 0.12)                  | 0.17 (-0.01, 0.35)       |
| Northeast (n=14)       | 0.03 (-0.09, 0.14)                     | 0.03 (-0.06, 0.13)       | -0.01 (-0.34, 0.31)                  | 0.16 (-0.09, 0.41)       |
| Northwest (n=12)       | 0.04 (-0.10, 0.18)                     | 0.17 (-0.15, 0.49)       | <b>0.58 (0.09, 1.06)</b>             | 0.54 (-0.14, 1.22)       |
| Central (n=15)         | 0.12 (-0.16, 0.41)                     | 0.08 (-0.13, 0.29)       | 0.10 (-0.32, 0.52)                   | 0.29 (-0.12, 0.69)       |
| <b>National (n=96)</b> | <b>0.05 (0.01, 0.09)</b>               | <b>0.07 (0.04, 0.11)</b> | <b>0.13 (0.02, 0.24)</b>             | <b>0.35 (0.22, 0.48)</b> |

**Note:** lag02, moving averaged concentration of lag 0 to lag 2 of daily  $\text{PM}_{2.5}$ ; bold typeface indicates statistically significant ( $P < 0.05$ ).

**Table S5.** The region-specific estimates of changes in years of life lost and excess risk of mortality caused by COPD per 10  $\mu\text{g}/\text{m}^3$  increment of  $\text{PM}_{2.5}$  at lag02 (stratified by gender).

| Region                 | Changes in years of life lost (95% CI) |                          | Excess risk of mortality, % (95% CI) |                          |
|------------------------|----------------------------------------|--------------------------|--------------------------------------|--------------------------|
|                        | Male                                   | Female                   | Male                                 | Female                   |
| East (n=31)            | <b>0.06 (0.01, 0.10)</b>               | <b>0.09 (0.04, 0.14)</b> | <b>0.16 (0.01, 0.31)</b>             | <b>0.50 (0.28, 0.71)</b> |
| South (n=8)            | 0.06 (-0.01, 0.13)                     | 0.01 (-0.03, 0.06)       | 0.30 (-0.001, 0.60)                  | 0.02 (-0.65, 0.71)       |
| Southwest (n=8)        | <b>0.25 (0.14, 0.36)</b>               | <b>0.14 (0.05, 0.22)</b> | 0.92 (-0.15, 2.01)                   | <b>1.35 (0.06, 2.65)</b> |
| North (n=8)            | 0.002 (-0.03, 0.03)                    | 0.02 (-0.01, 0.04)       | 0.01 (-0.24, 0.25)                   | <b>0.28 (0.01, 0.55)</b> |
| Northeast (n=14)       | 0.01 (-0.06, 0.08)                     | 0.01 (-0.04, 0.07)       | -0.04 (-0.38, 0.31)                  | 0.08 (-0.39, 0.54)       |
| Northwest (n=12)       | 0.08 (-0.01, 0.17)                     | 0.04 (-0.07, 0.16)       | <b>0.61 (0.18, 1.04)</b>             | <b>0.71 (0.03, 1.38)</b> |
| Central (n=15)         | -0.01 (-0.26, 0.24)                    | 0.05 (-0.11, 0.20)       | -0.001 (-0.49, 0.49)                 | 0.34 (-0.08, 0.77)       |
| <b>National (n=96)</b> | <b>0.04 (0.01, 0.06)</b>               | <b>0.03 (0.02, 0.05)</b> | <b>0.17 (0.03, 0.31)</b>             | <b>0.37 (0.26, 0.48)</b> |

**Note:** lag02, moving averaged concentration of lag 0 to lag 2 of daily  $\text{PM}_{2.5}$ ; bold typeface indicates statistically significant ( $P < 0.05$ ).

**Table S6.** The region-specific estimates of changes in years of life lost associated with each 10  $\mu\text{g}/\text{m}^3$  increment in  $\text{PM}_{2.5}$  at lag02 in two-pollutant models.

| Pollutant and Model                     | Changes in years of life lost (95% CI) |                          |
|-----------------------------------------|----------------------------------------|--------------------------|
|                                         | Respiratory diseases                   | COPD                     |
| <b>East (n=31)</b>                      |                                        |                          |
| + NO <sub>2</sub> (two-pollutant model) | <b>0.27 (0.10, 0.44)</b>               | <b>0.17 (0.07, 0.28)</b> |
| + SO <sub>2</sub> (two-pollutant model) | <b>0.29 (0.20, 0.37)</b>               | <b>0.23 (0.14, 0.31)</b> |
| + O <sub>3</sub> (two-pollutant model)  | <b>0.23 (0.11, 0.35)</b>               | <b>0.20 (0.11, 0.30)</b> |
| <b>South (n=8)</b>                      |                                        |                          |
| + NO <sub>2</sub> (two-pollutant model) | 0.001(-0.19, 0.19)                     | 0.07 (-0.02, 0.16)       |
| + SO <sub>2</sub> (two-pollutant model) | 0.32 (-0.2, 0.83)                      | <b>0.14 (0.03, 0.26)</b> |
| + O <sub>3</sub> (two-pollutant model)  | 0.17 (-0.04, 0.38)                     | <b>0.16 (0.06, 0.26)</b> |
| <b>Southwest (n=8)</b>                  |                                        |                          |
| + NO <sub>2</sub> (two-pollutant model) | <b>0.36 (0.15, 0.56)</b>               | 1.77 (-1.06, 4.61)       |
| + SO <sub>2</sub> (two-pollutant model) | <b>0.75 (0.52, 0.99)</b>               | 0.61 (-1.38, 2.60)       |
| + O <sub>3</sub> (two-pollutant model)  | <b>0.40 (0.19, 0.61)</b>               | 1.49 (-0.92, 3.89)       |
| <b>North (n=8)</b>                      |                                        |                          |
| + NO <sub>2</sub> (two-pollutant model) | -0.05 (-0.14, 0.05)                    | -0.01 (-0.05, 0.03)      |
| + SO <sub>2</sub> (two-pollutant model) | 0.01 (-0.07, 0.08)                     | 0.03 (-0.01, 0.07)       |
| + O <sub>3</sub> (two-pollutant model)  | -0.03 (-0.1, 0.04)                     | 0.01 (-0.03, 0.05)       |
| <b>Northeast (n=14)</b>                 |                                        |                          |
| + NO <sub>2</sub> (two-pollutant model) | -0.01 (-0.2, 0.17)                     | -0.03 (-0.10, 0.05)      |
| + SO <sub>2</sub> (two-pollutant model) | 0.07 (-0.07, 0.20)                     | 0.01 (-0.08, 0.10)       |
| + O <sub>3</sub> (two-pollutant model)  | 0.02 (-0.11, 0.16)                     | 0.01(-0.07, 0.08)        |
| <b>Northwest (n=12)</b>                 |                                        |                          |
| + NO <sub>2</sub> (two-pollutant model) | -0.05 (-0.25, 0.14)                    | 0.06 (-0.07, 0.19)       |
| + SO <sub>2</sub> (two-pollutant model) | 0.30 (-0.06, 0.65)                     | 0.15 (0.03, 0.27)        |
| + O <sub>3</sub> (two-pollutant model)  | 0.07 (-0.13, 0.28)                     | 0.07 (-0.06, 0.20)       |
| <b>Central (n=15)</b>                   |                                        |                          |



|                                         |                          |                          |
|-----------------------------------------|--------------------------|--------------------------|
| + NO <sub>2</sub> (two-pollutant model) | 0.15 (-0.49, 0.78)       | -0.10 (-0.67, 0.46)      |
| + SO <sub>2</sub> (two-pollutant model) | 0.20 (-0.35, 0.74)       | -0.01 (-0.48, 0.47)      |
| + O <sub>3</sub> (two-pollutant model)  | 0.04 (-0.06, 0.15)       | 0.04 (-0.26, 0.33)       |
| <b>National</b> (n=96)                  |                          |                          |
| + NO <sub>2</sub> (two-pollutant model) | <b>0.16 (0.05, 0.27)</b> | <b>0.08 (0.02, 0.14)</b> |
| + SO <sub>2</sub> (two-pollutant model) | <b>0.23 (0.13, 0.33)</b> | <b>0.14 (0.07, 0.21)</b> |
| + O <sub>3</sub> (two-pollutant model)  | <b>0.12 (0.06, 0.19)</b> | <b>0.08 (0.04, 0.12)</b> |

---

**Note:** lag02, moving averaged concentration of lag 0 to lag 2 of daily PM<sub>2.5</sub>; bold typeface indicates statistically significant (P<0.05).

**Table S7.** Sensitivity analyses for the changes in years of life lost associated with each 10  $\mu\text{g}/\text{m}^3$  increment in  $\text{PM}_{2.5}$  at lag02 in different models, with changing degrees of freedom.

| Regions                | df of temperature        |                          |                          |
|------------------------|--------------------------|--------------------------|--------------------------|
|                        | 5                        | 6                        | 7                        |
| East (n=31)            | <b>0.23 (0.11, 0.36)</b> | <b>0.23 (0.11, 0.36)</b> | <b>0.23 (0.11, 0.36)</b> |
| South (n=8)            | 0.04 (-0.14, 0.22)       | 0.04 (-0.14, 0.22)       | 0.02 (-0.16, 0.2)        |
| Southwest (n=8)        | <b>0.42 (0.22, 0.62)</b> | <b>0.42 (0.22, 0.62)</b> | <b>0.42 (0.22, 0.62)</b> |
| North (n=8)            | -0.02 (-0.09, 0.05)      | -0.02 (-0.09, 0.05)      | -0.02 (-0.09, 0.05)      |
| Northeast (n=14)       | 0.07 (-0.08, 0.22)       | 0.07 (-0.08, 0.23)       | 0.07 (-0.08, 0.23)       |
| Northwest (n=12)       | 0.19 (-0.15, 0.54)       | 0.19 (-0.15, 0.53)       | 0.19 (-0.15, 0.53)       |
| Central (n=15)         | 0.22 (-0.27, 0.70)       | 0.21 (-0.27, 0.70)       | 0.22 (-0.27, 0.70)       |
| <b>National (n=96)</b> | <b>0.16 (0.08, 0.24)</b> | <b>0.16 (0.08, 0.24)</b> | <b>0.16 (0.08, 0.24)</b> |

**Note:** lag02, moving averaged concentration of lag 0 to lag 2 of daily  $\text{PM}_{2.5}$ ; bold typeface indicates statistically significant ( $P < 0.05$ ).

**Table S8.** Sensitivity analyses for the changes in years of life lost associated with each 10  $\mu\text{g}/\text{m}^3$  increment in  $\text{PM}_{2.5}$  at lag02, with adding calendar year in the models.

| Region                 | Changes in years of life lost (95% CI) |                          | Excess risk of mortality, % (95% CI) |                          |
|------------------------|----------------------------------------|--------------------------|--------------------------------------|--------------------------|
|                        | Respiratory diseases                   | COPD                     | Respiratory diseases                 | COPD                     |
| East (n=31)            | <b>0.11 (0.05, 0.17)</b>               | <b>0.06 (0.02, 0.10)</b> | <b>0.18 (0.04, 0.32)</b>             | <b>0.19 (0.08, 0.29)</b> |
| South (n=8)            | 0.004 (-0.17, 0.18)                    | 0.06 (-0.02, 0.15)       | 0.09 (-0.19, 0.37)                   | 0.20 (-0.14, 0.54)       |
| Southwest (n=8)        | <b>0.30 (0.13, 0.48)</b>               | <b>0.27 (0.13, 0.42)</b> | <b>0.34 (0.18, 0.51)</b>             | 0.66 (-0.12, 1.45)       |
| North (n=8)            | -0.05 (-0.12, 0.03)                    | 0.01 (-0.03, 0.05)       | 0.01 (-0.11, 0.13)                   | 0.10 (-0.08, 0.28)       |
| Northeast (n=14)       | 0.02 (-0.13, 0.18)                     | 0.03 (-0.09, 0.14)       | 0.002 (-0.27, 0.28)                  | -0.01 (-0.31, 0.31)      |
| Northwest (n=12)       | 0.19 (-0.25, 0.64)                     | 0.05 (-0.07, 0.16)       | <b>0.58 (0.13, 1.04)</b>             | <b>0.64 (0.17, 1.11)</b> |
| Central (n=15)         | -0.04 (-0.14, 0.05)                    | -0.06 (-0.32, 0.2)       | 0.03 (-0.23, 0.28)                   | -0.01 (-0.33, 0.31)      |
| <b>National (n=96)</b> | 0.05 (-0.003, 0.11)                    | <b>0.04 (0.01, 0.07)</b> | <b>0.12 (0.05, 0.20)</b>             | <b>0.17 (0.08, 0.25)</b> |

**Note:** lag02, moving averaged concentration of lag 0 to lag 2 of daily  $\text{PM}_{2.5}$ ; bold typeface indicates statistically significant ( $P < 0.05$ ).

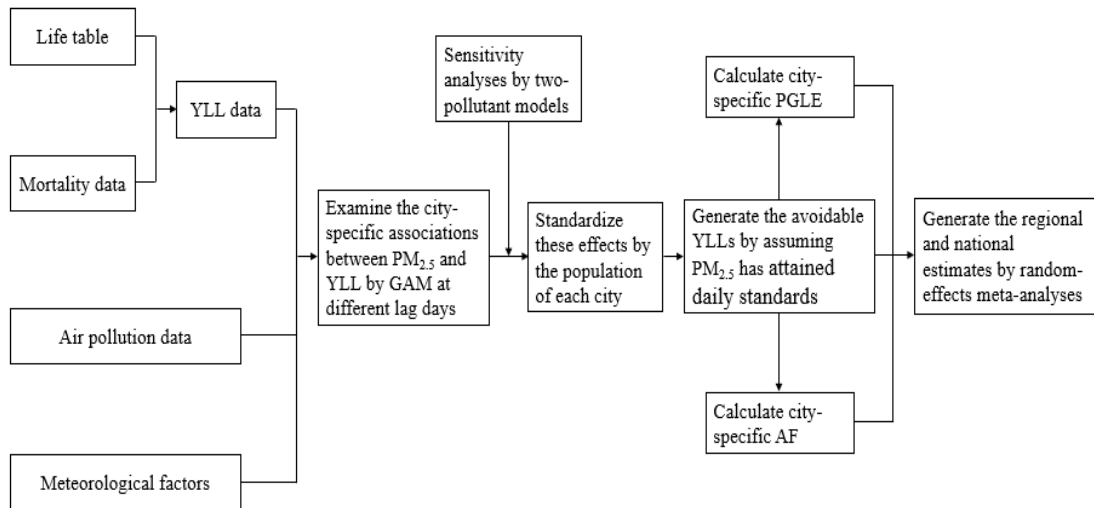

**Figure S1.** The flow chart of the analytical process.

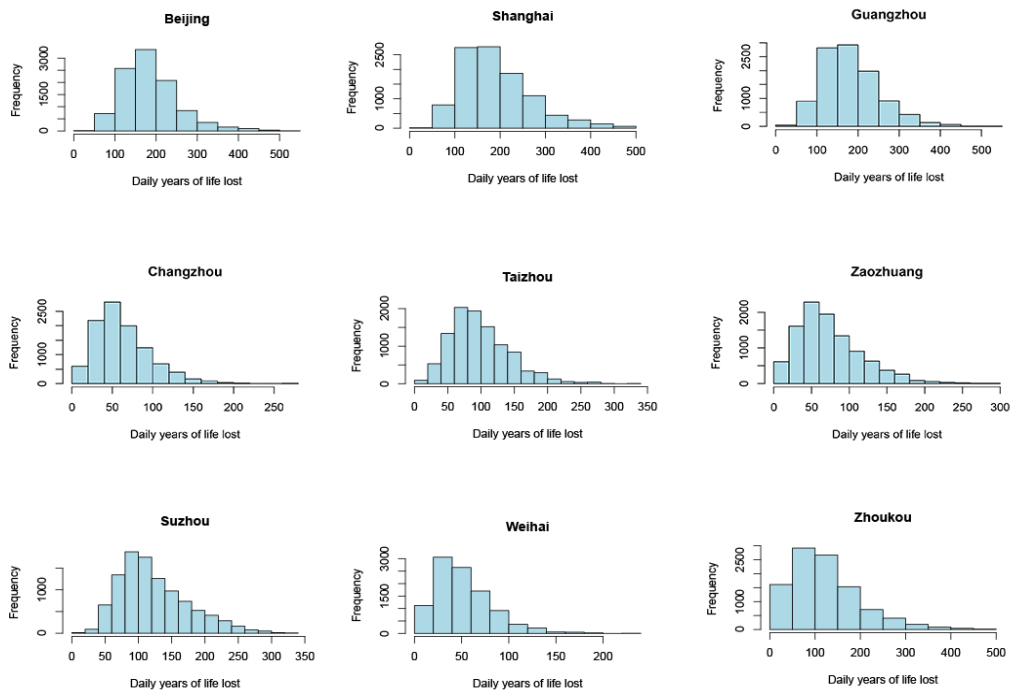

**Figure S2.** Histogram of daily years of life lost in several Chinese cities during 2013 to 2016.
